# Supplementary material
Source: Springer Nature journal article supplement (https://www.springermedizin.de/resource/supplementary/12916_2013_770_MOESM1_ESM.pdf/9598278)
Supplement: MOESM1 [file 9598278]

Schizoaffective  
Disorder

manic/depressed  
episode

Bipolar I Disorder

manic episode  
functional impairment

Schizophrenia

disorganized  
speech/behavior  
negative symptoms  
social/occupational  
dysfunction

Psychosis

```
graph TD; A["Schizoaffective Disorder  
manic/depressed episode"] --> D((Psychosis)); B["Bipolar I Disorder  
manic episode  
functional impairment"] --> D; C["Schizophrenia  
disorganized speech/behavior  
negative symptoms  
social/occupational dysfunction"] --> D;
```
